# Supplementary material for: Protein phosphatase 4 (PP4) functions as a critical regulator in tumor necrosis factor (TNF)-α-induced hepatic insulin resistance
Source: PubMed Central journal article supplement (PMC4678300; doi:10.1038/srep18093), 2015-12-15
Supplement: srep18093-s1.pdf [file srep18093-s1.pdf]

## Supplementary Information

for

### **Protein phosphatase 4 (PP4) functions as a critical regulator in tumor necrosis factor (TNF)- $\alpha$ -induced hepatic insulin resistance**

Hongye Zhao<sup>1,2,4</sup>, Xiuqing Huang<sup>2,4</sup>, Juan Jiao<sup>1,2</sup>, Hangxiang Zhang<sup>2</sup>, Jin Liu<sup>3</sup>, Weiwei Qin<sup>2</sup>, Xiangyu Meng<sup>2</sup>, Tao Shen<sup>2</sup>, Yajun Lin<sup>2</sup>, Jiaojiao Chu<sup>2</sup> & Jian Li<sup>1,2,\*</sup>

<sup>1</sup> Graduate School of Peking Union Medical College and Chinese Academy of Medical Sciences, Beijing 100730, China

<sup>2</sup> The Key Laboratory of Geriatrics, Beijing Hospital & Beijing Institute of Geriatrics, Ministry of Health, Beijing 100730, China

<sup>3</sup> College of Life Sciences, Beijing Normal University, 100875, P.R. China

<sup>4</sup> Co-first authors

\*Correspondence: [lijian@bjhmoh.cn](mailto:lijian@bjhmoh.cn)

## Supplementary Fig. S1

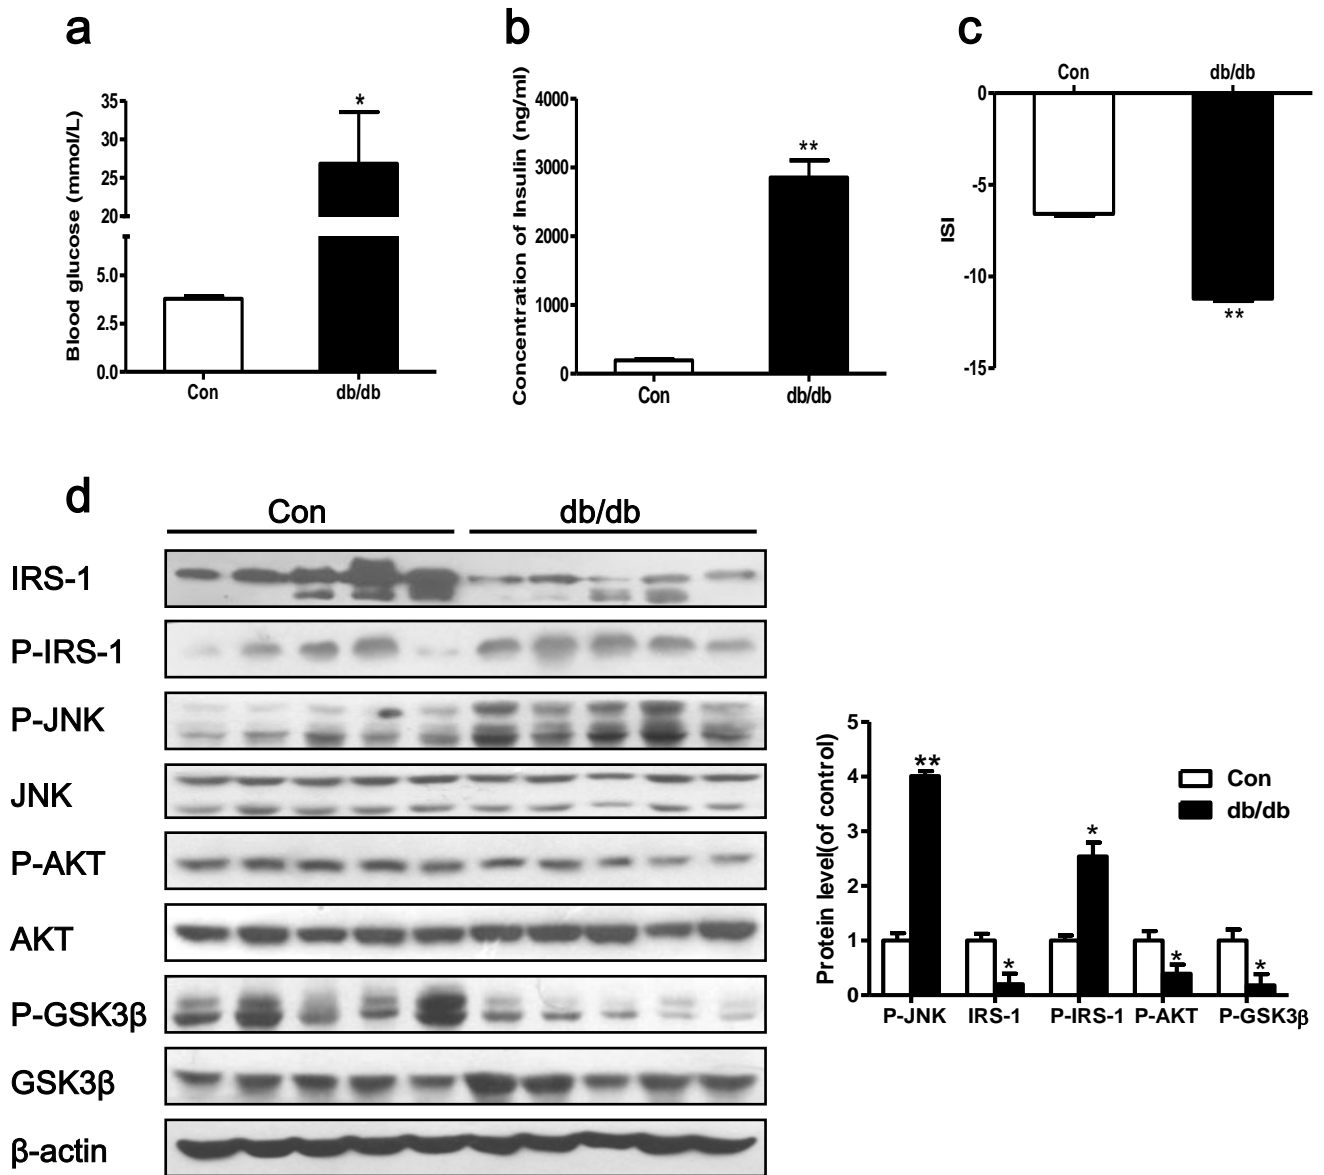

**Figure S1. db/db mice exhibited obvious features of insulin resistance.** The levels of blood glucose (**a**) and insulin concentration (**b**) were increased, whereas the insulin sensitive index (ISI) was decreased (**c**). The insulin signaling pathway was disordered in the livers of db/db mice, assessed by increased phosphorylation of IRS-1 (ser 307) and JNK, reduced expression of IRS-1 and AKT/GSK3β phosphorylation (**d**). Data represent the means  $\pm$  S.D., (n=10 mice *in vivo*). \*P<0.05 and \*\*P<0.01 versus control. Con — control.

## Supplementary Fig. S2

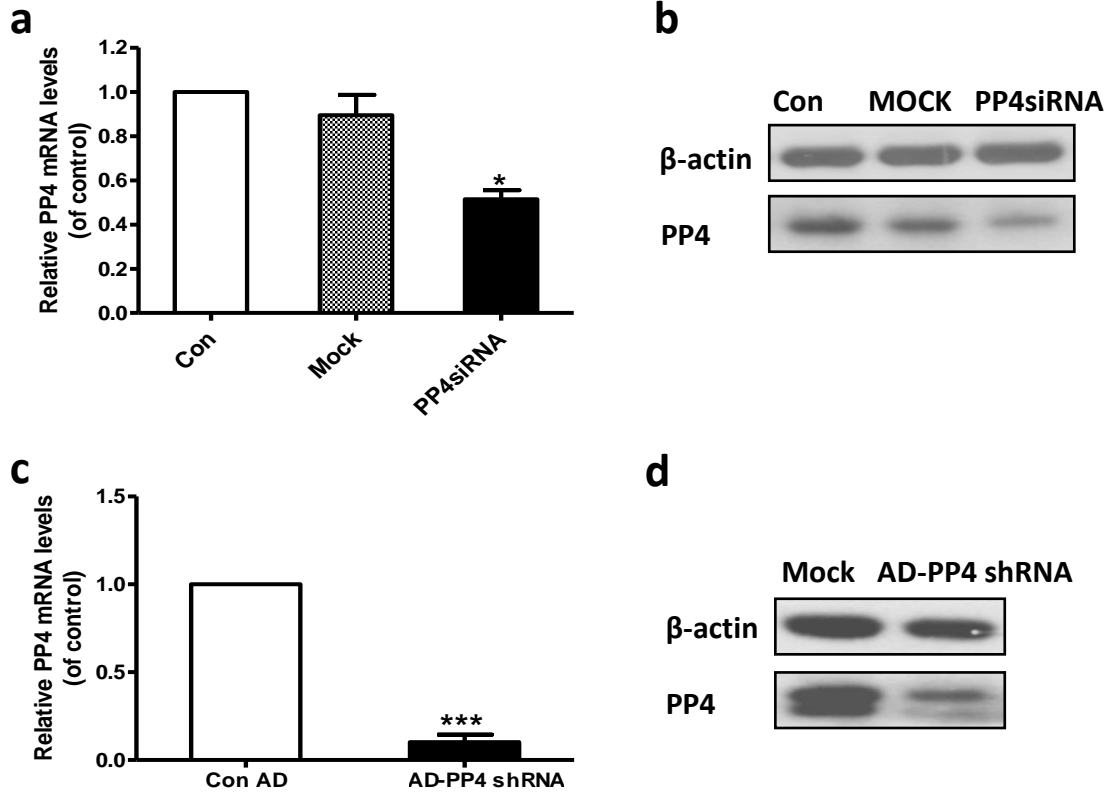

**Figure S2. Expression of PP4 was decreased by PP4 siRNA and AD-PP4 shRNA.** In order to knock down the expression of PP4, HepG2 cells and mouse primary hepatocytes were transfected with PP4siRNA or AD-PP4 shRNA, respectively. By applying quantitative real-time PCR and western blot analysis, we detected both PP4 siRNA (**a**, **b**) and AD-PP4 shRNA (**c**, **d**) could reduce the expression of PP4. Data represent the means  $\pm$  S.D., (n=3 independent experiments in vitro). \*P<0.05 and \*\*\*P<0.001 versus control. Con – control; Con AD – control AD.

**Supplementary Table S1. Oligonucleotides of PP4siRNA**

| <b>Gene Name</b> | <b>Sequences ( 5' &gt; 3')</b> |
|------------------|--------------------------------|
| PP4C-728s        | GGUACAAGUGGCACUUCATT           |
| PP4C-728as       | UGAAGUGCCACUUGUACCTT           |

**Supplementary Table S2. List of oligonucleotide primers for quantitative real-time PCR**

| Gene Name                             | Forward primer (F)<br>Reverse primer (R) | Primer' Sequences (5' > 3') |
|---------------------------------------|------------------------------------------|-----------------------------|
| 18s rRNA                              | <i>F</i>                                 | GTAACCCGTTGAACCCCAT         |
| 18s rRNA                              | <i>R</i>                                 | CCATCCAATCGGTAGTAGCG        |
| <i>Human PP4</i>                      | <i>F</i>                                 | CTGACCCAGAAGACACCACA        |
| <i>Human PP4</i>                      | <i>R</i>                                 | TGAGCACCGTCTCATTGAAG        |
| <i>Human G6Pase</i>                   | <i>F</i>                                 | TACGTCCTCTTCCCCATCTG        |
| <i>Human G6Pase</i>                   | <i>R</i>                                 | CCTGGTCCAGTCTCACAGGT        |
| <i>Human PEPCK</i>                    | <i>F</i>                                 | GAGAGAACTCCAGGGTGCTG        |
| <i>Human PEPCK</i>                    | <i>R</i>                                 | CCTTGGAGATGCTGAAAAGC        |
| <i>Human PGC-1<math>\alpha</math></i> | <i>F</i>                                 | CACCAGCCAACACTCAGCTA        |
| <i>Human PGC-1<math>\alpha</math></i> | <i>R</i>                                 | ACGTCTTTGTGGCTTTTGCT        |
| <i>Mouse PP4</i>                      | <i>F</i>                                 | CAATCATGAGAGTCGCCAGA        |
| <i>Mouse PP4</i>                      | <i>R</i>                                 | GATGGAAGGGGAAAGACCTC        |
| <i>Mouse G6pase</i>                   | <i>F</i>                                 | TCTGTCCCGGATCTACCTTG        |
| <i>Mouse G6pase</i>                   | <i>R</i>                                 | GTAGAATCCAAGCGCGAAAC        |
| <i>Mouse Pepck</i>                    | <i>F</i>                                 | TCTGAGATCTCTGATCCAGACC      |
| <i>Mouse Pepck</i>                    | <i>R</i>                                 | GAAGTCCAGACCGTTATGCAGC      |
| <i>Mouse Pgc-1<math>\alpha</math></i> | <i>F</i>                                 | GCCTATGAGCACGAAAGGC         |
| <i>Mouse Pgc-1<math>\alpha</math></i> | <i>R</i>                                 | TCACACGGCGCTCTTCAATT        |
| <i>Mouse Tnf-<math>\alpha</math></i>  | <i>F</i>                                 | CACAGAAAGCATGATCCGCG        |
| <i>Mouse Tnf-<math>\alpha</math></i>  | <i>R</i>                                 | ACTGATGAGAGGGAGGCCAT        |
